# Supplementary material for: Addressable electrochemiluminescence detection system based on redox-cycling of Ru(bpy)32+
Source: Royal Society of Chemistry journal article supplement (doi:10.1039/b915871e), 2009-11-16
Supplement: b915871e.pdf [file b915871e.pdf]

## Supporting information

### Experimental details

The experimental setup for ECL measurements is shown in Figure 1(C), which consists a BPCL Ultra-Weak Luminescence Analyzer (Institute of Biophysics, Chinese Academy of Science, Beijing, China) and a model VMP3 Multichannel Potentiostats and Power Boosters (Princeton Applied Research, USA). A homemade multiplex was used for the independent and simultaneous control the addressing working electrodes. All experiments performed using a Pt quasi-reference electrode. The counter electrode was a platinum wire. The microelectrode array chip was placed directly at the top of the photomultiplier tube (PMT) and was fixed in a dark detection chamber. The PMT was operated at -850 V. The entire ECL measurement setup was placed inside of a light-tight box.

$\text{Ru}(\text{bpy})_3\text{Cl}_2$  was obtained from Sigma Chemical Company and used without further purification, which had been dissolved in acetonitrile solution worked as ECL reagent. 0.2 mol/L tetra-*n*-butyl-ammonium tetrafluoroborate ( $\text{TBABF}_4$ ) acts as the supporting electrolyte. All solutions were deaerated before and between measurements with  $\text{N}_2$  for at least 10 min.
